# Supplementary material for: Photo-labile lamellar phases
Source: Royal Society of Chemistry journal article supplement (doi:10.1039/b802357c), 2008-01-01
Supplement: b802357c.pdf [file b802357c.pdf]

## Photo-labile Lamellar Phases-Electronic Supplementary Information

Aihua Zou, Julian Eastoe\*, Youssef Espidel, Otto Glatter<sup>#</sup> and Isabelle Grillo<sup>+</sup>

*School of Chemistry, University of Bristol, Bristol BS8 1TS, U. K,*

*julian.eastoe@bris.ac.uk.*

<sup>#</sup>*Institut für Chemie, Karl-Franzens Universität Graz, 8010 Graz, Austria and*

<sup>+</sup>*Institut Max-Von-Laue-Paul-Langevin, BP 156-X, F-38042 Grenoble, Cedex, France<sup>⊙</sup>*

### Materials and methods

#### <sup>2</sup>H-NMR measurements

Table S1. <sup>2</sup>H-NMR spectrum experimental conditions

|                                |             |
|--------------------------------|-------------|
| <b>Relaxation delay (s)=</b>   | <b>3.0</b>  |
| <b>90° pulse length(μs) =</b>  | <b>12.0</b> |
| <b>180° pulse length(μs) =</b> | <b>24</b>   |
| <b>Number of scans =</b>       | <b>2000</b> |

### 1. Phase behavior of AOT

A highly studied ionic surfactant producing lamellar phases is Aerosol-OT (AOT). The phase diagram of the system AOT/water binary is well established [1] (Figure S1), exhibiting a wide  $L_{\alpha}$  phase region, a narrow bi-continuous cubic region at  $\sim 80\%$  AOT, and an inverse hexagonal phase at higher concentrations. At high temperatures, above the lamellar phases is formed an isotropic liquid, which is a micellar solution.

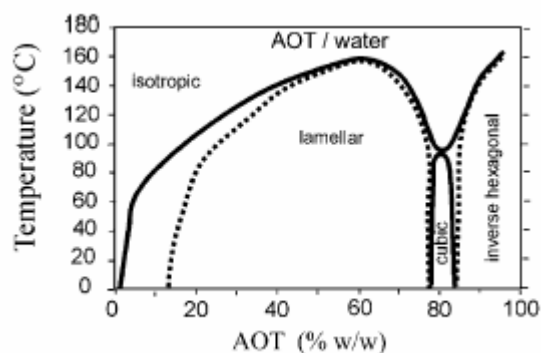

Figure S1. The phase diagram of the AOT-water binary system, from ref. 1. The main ordered phase is the lamellar  $L_{\alpha}$  state, with pockets of bi-continuous cubic and inverse hexagonal phases at high concentrations.

## 2. C<sub>6</sub>PAS photochemistry

Subject to UV irradiation alkyl-phenylazosulfonates switch from a hydrophilic (surfactant-based) to a hydrophobic system (photoproducts). As shown in Figure S2, photoirradiation of sodium 4-hexylphenylazosulfonate (C<sub>6</sub>PAS) leads to the formation of two photolysis products 4-hexylphenol and hexylbenzene [2-11]

Figure S3 shows <sup>1</sup>H NMR spectra for lamellar phases of 70 wt% (AOT/C<sub>6</sub>PAS)-water as a function of irradiation. It is clear that peaks from C<sub>6</sub>PAS ( $\delta = 7.86$  and  $7.26$ , Figure S3 upper) are absent after the photoreaction. After UV treatment a new weak multiplet at  $\delta = 7.1$  appears in the spectrum obtained (Figure S3 lower), which is consistent with a photostationary state dominated by the alkylbenzene.

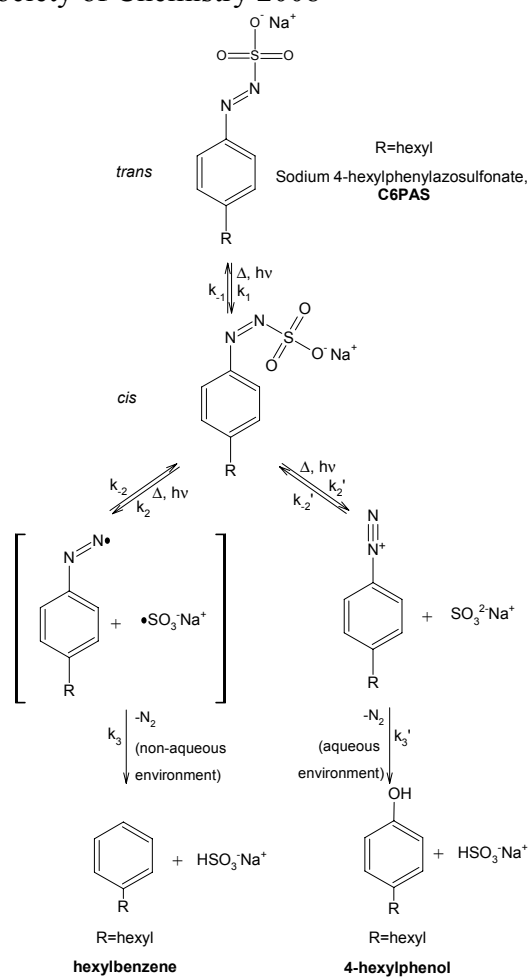

Figure S2. Mechanism of photolysis of phenylazosulfonates, Taken from reference [9].

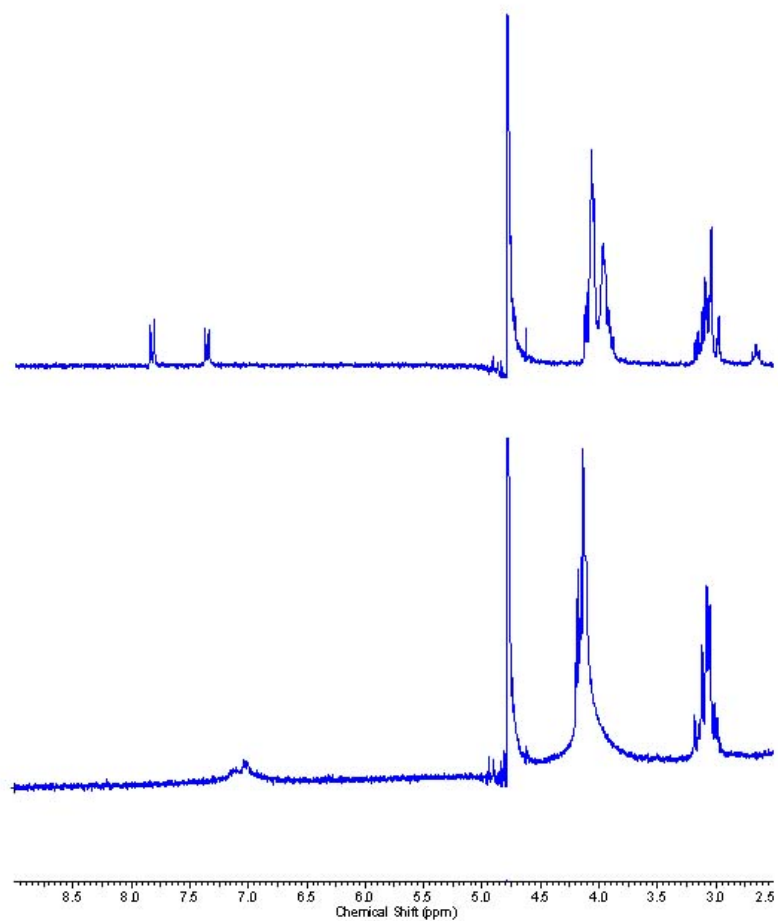

Figure S3. Partial  $^1\text{H}$  NMR spectra of lamellar phases at 25 °C: 70 wt% (AOT/C<sub>6</sub>PAS)-water mixtures before (top) and after (bottom) irradiation.

**References:**

1. J. Rogers and P.A Winsor, *J. Colloid Interface Sci.*, 1969, **30**, 247.
2. O. Nuyken and B. Voit, *Macromol. Chem. Phys.*, 1997, **198**, 2337
3. T. Mezger, O. Nuyken, K. Meindl, and A. Wokaun, *Progr. in Org. Coatings*, 1996, **29**, 147.
4. I.R. Dunkin, A. Gittinger, D.C. Sherrington and P. Wittaker, *J. Chem. Soc., Chem. Commun.*, 1994, 2245.
5. I.R. Dunkin, A. Gittinger, D.C. Sherrington, and P. Wittaker, *J. Chem. Soc., Perkin Trans. 2*, 1996, 1837.
6. J. Eastoe, M. Sanchez-Dominguez, H. Cumber, P. Wyatt and Heenan, R. K. *Langmuir*, 2004, **20**, 1120.
7. J. Eastoe, M. Sanchez-Dominguez, H. Cumber, G. Burnett, P. Wyatt and R.K. Heenan, *Langmuir*, 2003, **19**, 6579.
8. A. Vesperinas, J. Eastoe, P. Wyatt, I. Grillo, and R.K. Heenan, *Chem. Commun.*, 2006, 4407.
9. J. Eastoe and A. Vesperinas, *Soft Matter*, 2005, **1**, 338.
10. A. Vesperinas, J. Eastoe, P. Wyatt, I. Grillo, R. K. Heenan, J.M. Richards and G. A. Bell, *J. Am. Chem. Soc.*, 2006, **128**, 1468.
11. J. Eastoe, A. Vesperinas, A-C. Donnewirth, P. Wyatt, I. Grillo, R.K. Heenan and S. Davis, *Langmuir*, 2006, **22**, 851.
